# Supplementary material for: Evaluation of primer pairs for microbiome profiling from soils to humans within the One Health framework
Source: PubMed Central journal article supplement (PMC7693082; doi:10.1111/1755-0998.13215), 2020-08-18
Supplement: MEN-20-1558-s001.pdf [file MEN-20-1558-s001.pdf]

# MOLECULAR ECOLOGY

## RESOURCES

### Supplemental Information for:

### Evaluation of primer pairs for microbiome profiling from soils to humans within the One Health framework

Wasimuddin, Klaus Schlaeppli, Francesca Ronchi, Stephen L Leib, Matthias Erb, Alban Ramette

### Table of Contents:

|                               |          |
|-------------------------------|----------|
| <b>Supplementary Table 1</b>  | Page 2   |
| <b>Supplementary Table 2</b>  | Page 3-4 |
| <b>Supplementary Table 3</b>  | Page 5   |
| <b>Supplementary Table 4</b>  | Page 5   |
| <b>Supplementary Table 5</b>  | Page 6   |
| <b>Supplementary Figure 1</b> | Page 7   |
| <b>Supplementary Figure 2</b> | Page 8   |
| <b>Supplementary Figure 3</b> | Page 9   |

**Supplementary Table 1.** Details of the samples used in the current study

| <b>Sample_ID</b> | <b>Source</b>  | <b>Sample Characteristics</b> | <b>Sample Location</b> | <b>DNA Extraction Kit</b>       |
|------------------|----------------|-------------------------------|------------------------|---------------------------------|
| S1               | Soil           | Soil-type1                    | ARA_Uetendorf          | PowerSoil Pro, NucleoSpin Soil  |
| S2               | Soil           | Soil-type2                    | Bodenacker             | PowerSoil Pro, NucleoSpin Soil  |
| S3               | Soil           | Soil-type3                    | Kurzacker              | PowerSoil Pro, NucleoSpin Soil  |
| S4               | Soil           | Soil-type4                    | Panorama               | PowerSoil Pro, NucleoSpin Soil  |
| S5               | Soil           | Soil-type5                    | Q_matte                | PowerSoil Pro, NucleoSpin Soil  |
| R1               | Maize-root     | Maize-root-type1              | Ithaca                 | PowerSoil Pro, NucleoSpin Soil  |
| R2               | Maize-root     | Maize-root-type2              | Changins               | PowerSoil Pro, NucleoSpin Soil  |
| R3               | Maize-root     | Maize-root-type2              | Changins               | PowerSoil Pro, NucleoSpin Soil  |
| R4               | Maize-root     | Maize-root-type2              | Changins               | PowerSoil Pro, NucleoSpin Soil  |
| R5               | Maize-root     | Maize-root-type3              | Reckenholz             | PowerSoil Pro, NucleoSpin Soil  |
| R6               | Maize-root     | Maize-root-type3              | Reckenholz             | PowerSoil Pro, NucleoSpin Soil  |
| C1               | Cow            | Animal1                       | Vetsuisse              | PowerSoil Pro                   |
| C2               | Cow            | Animal2                       | Vetsuisse              | PowerSoil Pro                   |
| C3               | Cow            | Animal3                       | Vetsuisse              | PowerSoil Pro                   |
| C4R              | Cow-rumen      | Animal4                       | Vetsuisse              | PowerSoil Pro                   |
| C5R              | Cow-rumen      | Animal5                       | Vetsuisse              | PowerSoil Pro                   |
| H1               | Human          | Male_Age-44Y                  | Swiss-National         | PowerSoil Pro                   |
| H2               | Human          | Male_Age-02Y                  | Swiss-National         | PowerSoil Pro                   |
| H3               | Human          | Female_Age-26Y                | Swiss-National         | PowerSoil Pro                   |
| H4               | Human          | Female_Age-43Y                | Swiss-National         | PowerSoil Pro                   |
| H5               | Human          | Male_Age-38Y                  | Indian-National        | PowerSoil Pro                   |
| H6               | Human          | Female_Age-30Y                | Indian-National        | PowerSoil Pro                   |
| M1               | Mouse          | Female_ASF4-colonized         | DBMR                   | PowerSoil Pro, QIAamp DNA Stool |
| M2               | Mouse          | Female_ASF4-colonized         | DBMR                   | PowerSoil Pro, QIAamp DNA Stool |
| M3               | Mouse          | Female_ASF4-colonized         | DBMR                   | PowerSoil Pro, QIAamp DNA Stool |
| M4               | Mouse          | Female_ASF4-colonized         | DBMR                   | PowerSoil Pro, QIAamp DNA Stool |
| M5               | Mouse          | Female_ASF4-colonized         | DBMR                   | PowerSoil Pro, QIAamp DNA Stool |
| MC1              | Mock-community | Eight-bacterial-species       | ZymoBIOMICS            | NA                              |
| MC2              | Mock-community | Eight-bacterial-species       | ZymoBIOMICS*           | NA                              |
| MC3              | Mock-community | Eight-bacterial-species       | ZymoBIOMICS*           | NA                              |
| MC4              | Mock-community | Eight-bacterial-species       | ZymoBIOMICS*           | NA                              |
| MC5              | Mock-community | Eight-bacterial-species       | ZymoBIOMICS*           | NA                              |

\*ZymoBIOMICS Microbial Community DNA Standard

**Supplementary Table 2.** *In silico* coverage (in proportion) of primer pairs at domain and phylum level

| Taxonomy level | Taxonomy for current level | Total seqs | 787F-1073R | 799F-1193R | 515F-806R | 341F-805R |
|----------------|----------------------------|------------|------------|------------|-----------|-----------|
| Archaea        | Archaea                    | 25026      | 0.4914     | 0          | 0.9639    | 0.8359    |
| Bacteria       | Bacteria                   | 592605     | 0.9691     | 0.8604     | 0.962     | 0.9669    |
| Eukaryota      | Eukaryota                  | 77540      | 0          | 0          | 0.1663    | 0.0012    |
| Bacteria       | Proteobacteria             | 238929     | 0.9795     | 0.945      | 0.9799    | 0.9783    |
| Bacteria       | Firmicutes                 | 149757     | 0.9743     | 0.9182     | 0.9662    | 0.964     |
| Bacteria       | Actinobacteria             | 60510      | 0.9799     | 0.9654     | 0.8796    | 0.9723    |
| Bacteria       | Bacteroidetes              | 55663      | 0.9669     | 0.9489     | 0.9742    | 0.9752    |
| Bacteria       | Acidobacteria              | 14534      | 0.9786     | 0.4586     | 0.9763    | 0.9788    |
| Bacteria       | Cyanobacteria              | 13970      | 0.8763     | 0.0088     | 0.9469    | 0.9465    |
| Bacteria       | Chloroflexi                | 9245       | 0.8852     | 0.2967     | 0.9447    | 0.9125    |
| Bacteria       | Planctomycetes             | 9014       | 0.9432     | 0.1295     | 0.9698    | 0.8776    |
| Bacteria       | Epsilonbacteraeota         | 5422       | 0.9572     | 0.8834     | 0.9817    | 0.9875    |
| Bacteria       | Patescibacteria            | 4521       | 0.7863     | 0.1694     | 0.8505    | 0.7436    |
| Bacteria       | Verrucomicrobia            | 4419       | 0.9446     | 0.1749     | 0.9615    | 0.9556    |
| Bacteria       | Spirochaetes               | 4253       | 0.925      | 0.858      | 0.902     | 0.9737    |
| Bacteria       | Tenericutes                | 2561       | 0.9559     | 0.4775     | 0.9805    | 0.977     |
| Bacteria       | Fusobacteria               | 2216       | 0.977      | 0.9666     | 0.9675    | 0.968     |
| Bacteria       | Gemmatimonadetes           | 2185       | 0.9611     | 0.9414     | 0.9593    | 0.9629    |
| Bacteria       | Nitrospirae                | 1297       | 0.9792     | 0.9545     | 0.9776    | 0.9807    |
| Bacteria       | Synergistetes              | 1152       | 0.9861     | 0.1615     | 0.9783    | 0.9583    |
| Bacteria       | Kiritimatiellaota          | 975        | 0.96       | 0.799      | 0.9477    | 0.9631    |
| Bacteria       | Deinococcus-thermus        | 948        | 0.9631     | 0.9525     | 0.9789    | 0.9821    |
| Bacteria       | Armatimonadetes            | 752        | 0.9707     | 0.3191     | 0.9681    | 0.3218    |
| Bacteria       | Fibrobacteres              | 751        | 0.9587     | 0.9494     | 0.9614    | 0.9587    |
| Bacteria       | Dependentiae               | 580        | 0.981      | 0.8897     | 0.9897    | 0.9828    |
| Bacteria       | Atribacteria               | 578        | 0.9913     | 0.0969     | 0.9792    | 0.9723    |
| Bacteria       | Marinimicrobia             | 554        | 0.9838     | 0.9206     | 0.9819    | 0.9675    |
| Bacteria       | Omnitrophicaeota           | 507        | 0.9566     | 0.5089     | 0.9803    | 0.7456    |
| Bacteria       | Latescibacteria            | 497        | 0.994      | 0.4447     | 0.9819    | 0.9899    |
| Bacteria       | Lentisphaerae              | 469        | 0.9062     | 0.6269     | 0.9574    | 0.9659    |
| Bacteria       | Chlamydiae                 | 450        | 0.9867     | 0.8178     | 0.9533    | 0.9889    |
| Bacteria       | Elusimicrobia              | 435        | 0.9724     | 0.9172     | 0.9885    | 0.9839    |
| Bacteria       | Rokubacteria               | 380        | 0.9737     | 0.0079     | 0.9711    | 0.9763    |
| Bacteria       | Brc1                       | 380        | 0.9684     | 0.0842     | 0.9421    | 0.9684    |
| Bacteria       | Nitrospinae                | 364        | 0.9698     | 0.022      | 0.9918    | 0.9863    |
| Bacteria       | Aquificae                  | 346        | 0.9393     | 0.9595     | 0.9595    | 0.9855    |
| Bacteria       | Thermotogae                | 303        | 0.1716     | 0.769      | 0.9736    | 0.9868    |
| Bacteria       | Cloacimonetes              | 301        | 0.9668     | 0.8173     | 0.9435    | 0.9568    |
| Bacteria       | Calditrichaeota            | 275        | 0.9636     | 0.9564     | 0.9455    | 0.9418    |
| Bacteria       | Hydrogenedentes            | 271        | 0.9779     | 0.1771     | 0.9852    | 0.9668    |
| Bacteria       | Halanaerobiaeota           | 270        | 0.9667     | 0.0444     | 0.9667    | 0.9593    |
| Bacteria       | Modulibacteria             | 255        | 0.9686     | 0.0392     | 0.9255    | 0.9294    |
| Bacteria       | Zixibacteria               | 203        | 0.9901     | 0.9606     | 0.9655    | 0.9704    |

*Continued on page 4*

|          |                          |     |        |        |        |        |
|----------|--------------------------|-----|--------|--------|--------|--------|
| Bacteria | Dadabacteria             | 169 | 0.9704 | 0.8817 | 0.9763 | 0.9822 |
| Bacteria | Entotheonellaeota        | 168 | 0.9286 | 0.9524 | 0.9702 | 0.9643 |
| Bacteria | Acetothermia             | 165 | 0.9697 | 0.2364 | 0.9879 | 0.9939 |
| Bacteria | Fbp                      | 155 | 0.1935 | 0.8452 | 0.9484 | 0.9613 |
| Bacteria | Deferribacteres          | 134 | 0.8881 | 0.9701 | 0.9925 | 0.9851 |
| Bacteria | Gn01                     | 120 | 0.9417 | 0.8    | 0.8833 | 0.0583 |
| Bacteria | Caldiserica              | 95  | 0.8947 | 0.9263 | 0.9263 | 0.9684 |
| Bacteria | Ws1                      | 93  | 0.9892 | 0.0323 | 0.9677 | 0.0323 |
| Bacteria | Pauc34f                  | 88  | 0.6364 | 0.7273 | 0.9773 | 0.9545 |
| Bacteria | Margulisbacteria         | 86  | 1      | 0.4419 | 1      | 0.9535 |
| Bacteria | Coprothermobacteraeota   | 76  | 0.8947 | 0.9474 | 0.9211 | 0.9474 |
| Bacteria | Ta06                     | 68  | 0.8971 | 0.6765 | 0.9412 | 0.9853 |
| Bacteria | Aerophobetes             | 66  | 0.9848 | 0      | 0.9091 | 0.9242 |
| Bacteria | Ws2                      | 58  | 0.931  | 0.0172 | 0.9655 | 0.8621 |
| Bacteria | Aegiribacteria           | 52  | 1      | 0.2692 | 0.9808 | 0.9808 |
| Bacteria | Wps-2                    | 51  | 0.9804 | 0.0588 | 0.9412 | 0.9412 |
| Bacteria | Poribacteria             | 49  | 0.9796 | 0.0204 | 0.9388 | 0.8776 |
| Bacteria | Lcp-89                   | 46  | 0.9565 | 1      | 0.9783 | 1      |
| Bacteria | Gal15                    | 43  | 1      | 0      | 1      | 0.9767 |
| Bacteria | Bhi80-139                | 41  | 0.9756 | 0.4146 | 0.9756 | 0.9756 |
| Bacteria | Schekmanbacteria         | 40  | 0.975  | 0.025  | 1      | 1      |
| Bacteria | Hydrothermae             | 38  | 0.9474 | 0      | 0.9737 | 0.9474 |
| Bacteria | Fcpu426                  | 37  | 0.8919 | 0.2432 | 0.9189 | 0.8919 |
| Bacteria | Wor-1                    | 34  | 0.9412 | 0.0882 | 0.9706 | 1      |
| Bacteria | Mat-cr-m4-b07            | 25  | 1      | 1      | 0.96   | 1      |
| Bacteria | Anck6                    | 21  | 1      | 1      | 1      | 1      |
| Bacteria | Ck-2c2-2                 | 21  | 0.9524 | 0.7619 | 1      | 1      |
| Bacteria | Ws4                      | 16  | 1      | 0.0625 | 1      | 1      |
| Bacteria | Chrysiogenetes           | 12  | 1      | 1      | 1      | 1      |
| Bacteria | Dictyoglomi              | 11  | 1      | 0      | 1      | 1      |
| Bacteria | Rsahf231                 | 8   | 1      | 0      | 1      | 1      |
| Bacteria | Uncultured               | 5   | 1      | 0.2    | 1      | 1      |
| Bacteria | Fervidibacteria          | 4   | 1      | 1      | 1      | 1      |
| Bacteria | Edwardsbacteria          | 4   | 1      | 0.25   | 1      | 0.25   |
| Bacteria | Firestonebacteria        | 3   | 1      | 1      | 1      | 1      |
| Bacteria | Calescamantes            | 3   | 1      | 1      | 1      | 1      |
| Bacteria | Thermosulfidibacteraeota | 3   | 1      | 1      | 1      | 1      |
| Bacteria | Desantisbacteria         | 2   | 1      | 1      | 1      | 1      |
| Bacteria | Gbs-1                    | 2   | 1      | 1      | 1      | 1      |
| Bacteria | Lindowbacteria           | 1   | 1      | 0      | 1      | 1      |

**Supplementary Table 3.** Distribution of reads at domain level and for chloroplast and mitochondria for used primer pairs

| Primer pair | Bacteria  | Chloroplast | Mitochondria | Archaea |
|-------------|-----------|-------------|--------------|---------|
| 787F-1073R  | 2,039,730 | 16          | 17340        | 0       |
| 799F-1193R  | 1,912,307 | 0           | 0            | 6       |
| 515F-806R   | 3,477,339 | 41592       | 61908        | 79066   |
| 341F-805R   | 1,560,345 | 49775       | 21685        | 1552    |

**Supplementary Table 4.** Summary of the best model (GLM) predicting (a) Observed species and (b) Shannon diversity according to primer pair, source, extraction kit and primer pair\*source compartment interaction. Significant values (<0.05) are shown in bold.

| Variables                      | SumsOfSqs | MeanSqs | F.Model  | p                |
|--------------------------------|-----------|---------|----------|------------------|
| <b>(a) Observed species</b>    |           |         |          |                  |
| Primerpair                     | 31604     | 10535   | 8.0362   | <b>&lt;0.001</b> |
| Source compartment             | 810819    | 162164  | 123.7055 | <b>&lt;0.001</b> |
| Extraction kit                 | 49        | 49      | 0.0376   | 0.846            |
| Primer pair*Source compartment | 26790     | 1786    | 1.3624   | 0.171            |
| <b>(b) Shannon</b>             |           |         |          |                  |
| Primerpair                     | 4.848     | 1.616   | 11.2825  | <b>&lt;0.001</b> |
| Source compartment             | 181.966   | 36.393  | 254.0917 | <b>&lt;0.001</b> |
| Extraction kit                 | 0.25      | 0.25    | 1.7454   | 0.188            |
| Primer pair*Source compartment | 3.805     | 0.254   | 1.771    | <b>0.042</b>     |

**Supplementary Table 5.** Summary of the best model (GLM) predicting (a) Observed species and (b) Shannon diversity according to primer pair, source, extraction kit and primer pair\*source compartment interaction. Significant values (<0.05) are shown in bold.

| <b>Variables</b>               | <b>SumsOfSqs</b> | <b>MeanSqs</b> | <b>F.Model</b> | <b>R<sup>2</sup></b> | <b>p</b>     |
|--------------------------------|------------------|----------------|----------------|----------------------|--------------|
| <b>(a) Jaccard</b>             |                  |                |                |                      |              |
| Primerpair                     | 2.025            | 0.675          | 3.513          | 0.02464              | <b>0.001</b> |
| Source compartment             | 39.965           | 7.9931         | 41.597         | 0.48633              | <b>0.001</b> |
| Extraction kit                 | 0.319            | 0.3188         | 1.659          | 0.00388              | 0.052        |
| Primer pair*Source compartment | 8.739            | 0.5826         | 3.032          | 0.10635              | <b>0.001</b> |
| Residuals                      | 31.129           | 0.1922         |                | 0.3788               |              |
| Total                          | 82.178           |                |                | 1                    |              |
| <b>(b) Bray-Curtis</b>         |                  |                |                |                      |              |
| Primerpair                     | 1.717            | 0.5722         | 4.401          | 0.02196              | <b>0.001</b> |
| Source compartment             | 48.84            | 9.7679         | 75.124         | 0.62468              | <b>0.001</b> |
| Extraction kit                 | 0.192            | 0.1924         | 1.48           | 0.00246              | 0.142        |
| Primer pair*Source compartment | 6.371            | 0.4247         | 3.267          | 0.08149              | <b>0.001</b> |
| Residuals                      | 21.064           | 0.13           |                | 0.26942              |              |
| Total                          | 78.184           |                |                | 1                    |              |

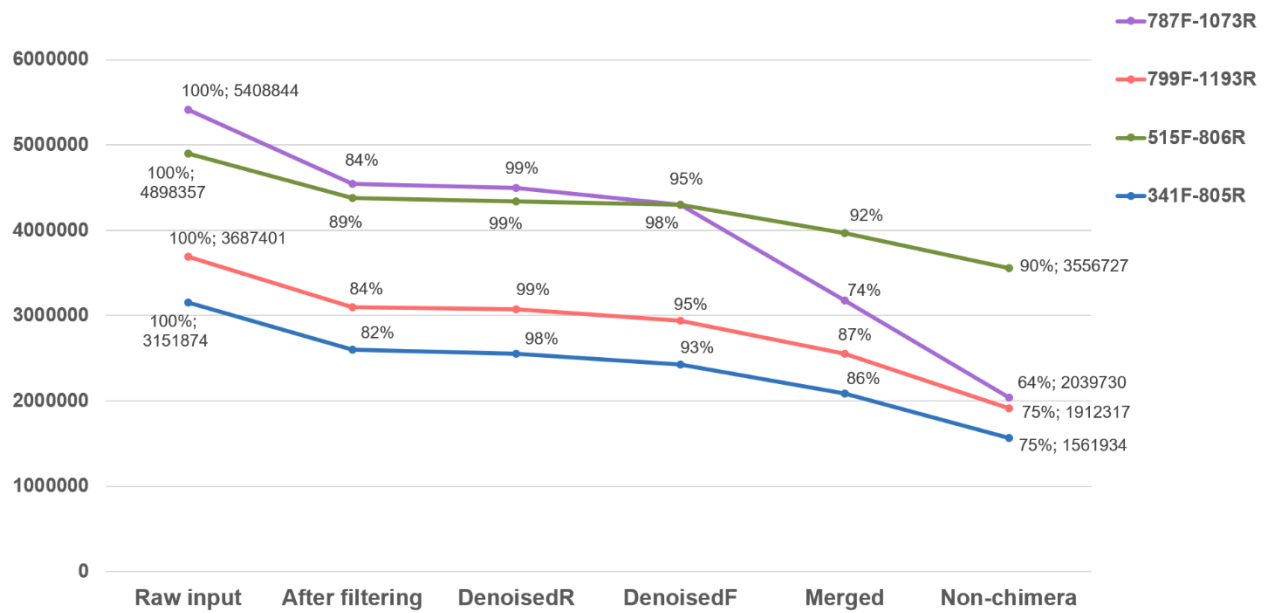

**Supplementary Figure 1.** Distribution of reads at different stages of amplicon processing pipeline for used primer pairs

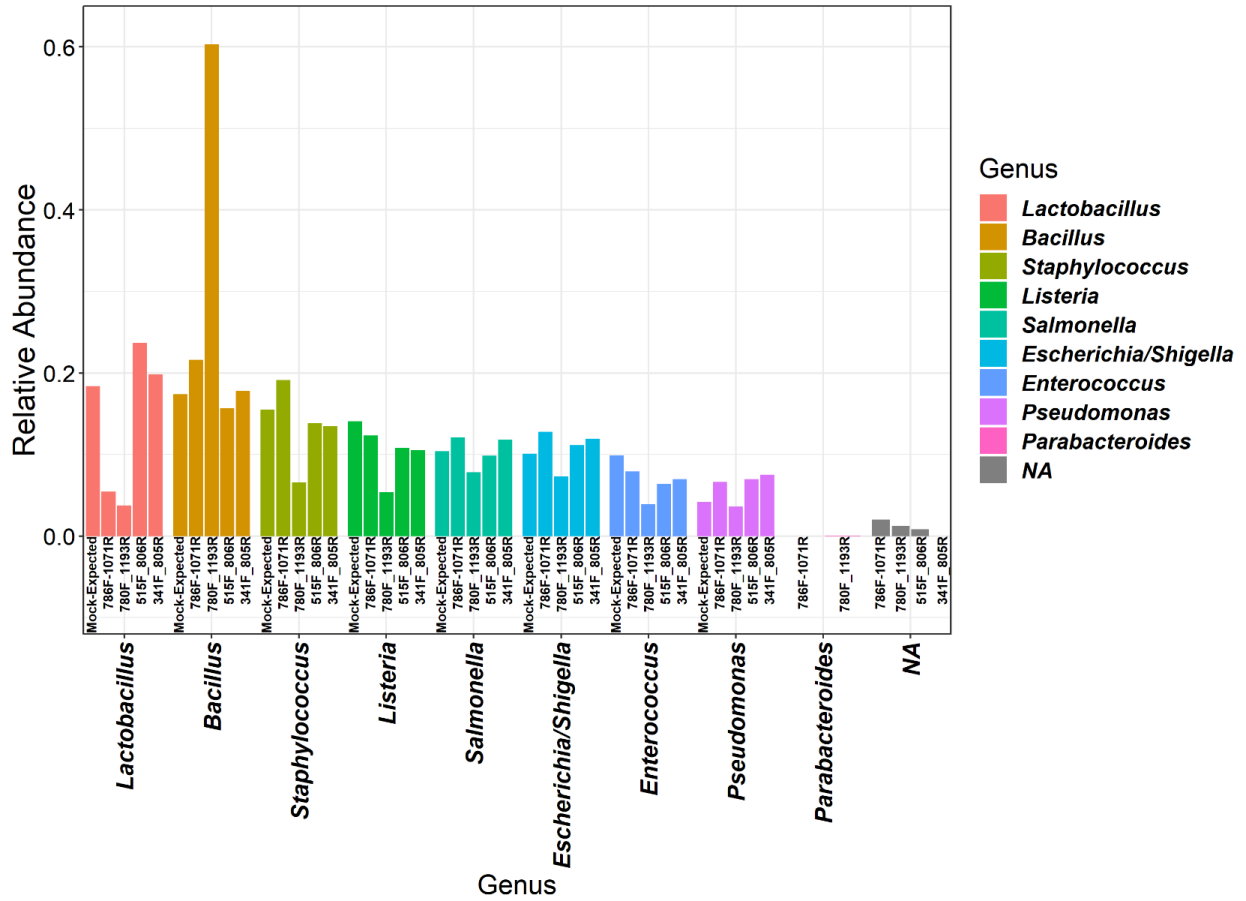

**Supplementary Figure 2.** Bar plots showing expected mock community, mock community amplified by four primer pairs at genus level. NA represents unassigned taxa at genus level



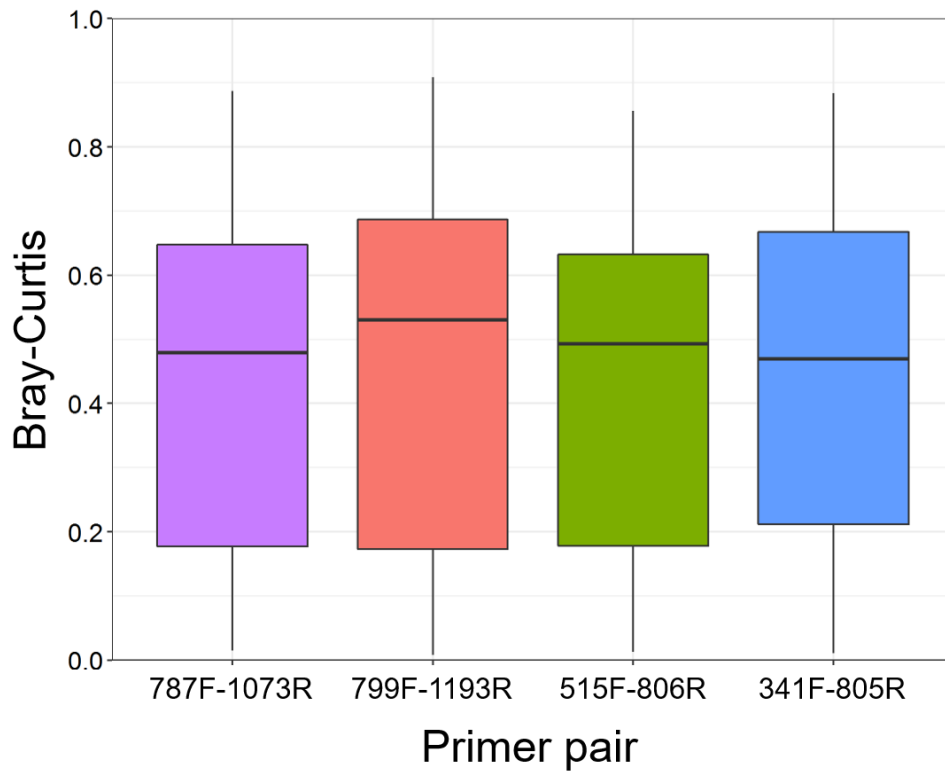

**Supplementary Figure 3.** Box plots showing average beta diversity based on Bray-Curtis metric for each prime pair. No significant difference in average beta diversity values was observed among primer pairs
